# Supplementary material
Source: ML conference proceedings conference paper supplement (https://openaccess.thecvf.com/content/CVPR2026/html/Li_RemedyGS_Defend_3D_CVPR_2026_paper.html)
Supplement: Supplementary file 1 [file Li_RemedyGS_Defend_3D_CVPR_2026_supplemental.pdf]

# RemedyGS: Defend 3D Gaussian Splatting against Computation Cost Attacks

## Supplementary Material

### 7. Additional Experimental Results

#### 7.1. Defend Against Black-box Attack

In Section 5, we validate that our defense framework achieves a favorable trade-off between safety and utility against white-box attacks. In this subsection, we further evaluate its effectiveness against black-box attacks. Similarly, we use the official implementation of Poison-splat [3] to simulate attacker behavior in black-box settings and the official implementations of Scaffold-GS [4] to simulate victim behavior. As reported in Tables 6 and 7, our defense framework consistently outperforms naive defenses, yielding improvements in utility by more than 1 dB while maintaining comparable safety. The results indicate that our proposed framework demonstrates significant effectiveness in different settings and provides comprehensive safeguarding for real-world 3DGS systems.

#### 7.2. Defend Against Attacks of Different Strengths

We evaluate our defense framework under attacks of different strengths in the white-box setting. For the detector, we consider  $\epsilon = 50/255$ ,  $\epsilon = 100/255$ , and  $\epsilon = 150/255$ , and report accuracy, F1 score, and recall metrics on mixed poisoned and clean datasets. As shown in Table 8, the detector consistently achieves a strong discrimination capability, demonstrating notable robustness against different settings. We then assess the purifier with  $\epsilon = 26/255$ ,  $\epsilon = 35/255$ , and  $\epsilon = 40/255$ , as detailed in Table 9 and Table 10. Baselines such as image smoothing and limiting the number of Gaussians demonstrate weaker robustness and incur rapidly increasing computational cost as attack strengths are intensified, while our method remains effective even under stronger adversaries. In terms of utility, our approach also delivers superior 3D reconstruction. With increasing  $\epsilon$ , naive defenses degrade performance by up to 3 dB, whereas our method suffers far less degradation and consistently outperforms baselines. Overall, our framework achieves a more favorable trade-off between safety and utility across different attack strengths.

#### 7.3. Defend Against Adaptive Attacks

In this subsection, we further evaluate the defensive capabilities of our approach against adaptive computation cost attacks. In general adaptive attacks [1, 2, 5, 6], the attackers are aware of the defense strategy and actively adapt their attack strategy to more effectively exploit the system vulnerabilities in response to the deployed defense. Therefore, we assess the robustness of our defense method when confronted with stronger adversaries that explicitly leverage the

knowledge of the defense to enable more challenging attacks. Notably, prior work [3] has not explored adaptive attacks that target the computation cost in 3DGS systems. To the best of our knowledge, we are the first to study the adaptive attack variant tailored for this topic, along with a comprehensive evaluation of our defense framework against such adaptive computation cost attack.

First, we develop an adaptive attack formulation that incorporates the knowledge of our defense mechanism. Our defense relies on detecting distributional discrepancies between attacked and clean images, followed by a purifier that removes the negative influence introduced by the adversary and aligns the resulting distribution with the source distribution. Being aware of this defense strategy, the adversary can augment its attack optimization process with additional constraints that enforce the adversarial images to remain close to the clean distribution, thereby undermining the defense framework and inducing more severe vulnerabilities. Specifically, we formulate the adaptive attack objective by adding a new weighted term, the mutual information between the poisoned images and the clean images, to the objective of the computation cost attack, enabling the attacker to produce more subtle and harder-to-defend adversarial perturbations. Mathematically, it is expressed as:

$$\max_{\mathcal{V}_{\text{poi}}} \mathcal{L}_{\text{ada}} = \max_{\mathcal{V}_{\text{poi}}} \{ \mathcal{S}_{TV}(\mathcal{V}_{\text{poi}}) + \beta \cdot I(\mathbf{V}_{\text{cln}}; \mathbf{V}_{\text{poi}}) \}, \quad (15)$$

where  $\mathcal{S}_{TV}$ ,  $I(\mathbf{V}_{\text{cln}}; \mathbf{V}_{\text{poi}})$ , and  $\beta$  denote the TV score, mutual information between the poisoned images and the clean images, and the weight of mutual information, respectively. This formulation allows the attacker to simulate stronger and more stealthy attacks.

For a comprehensive evaluation of defense performance, we evaluate the robustness of our defense method against this adaptive computation cost attack, which presents stronger vulnerabilities. Specifically, we set  $\beta$  as 1, 5, and 20 to perform adaptive computation cost attack and obtain the adaptively attacked images. Then, the attacked images are utilized to evaluate our defense strategy. Experimental results are reported in Table 11 and Table 12. Our method consistently demonstrates strong defense capabilities against adaptive attacks and recover the clean images from the attacked images.

#### 7.4. Impact of Undetected Poisoned Images

In addition to investigating the impact of misclassified clean images on the system’s utility performance in Table 4, we further investigate the effect of undetected poisoned images on system safety. Specifically, we assess how varying pro-

Table 6. Comparison of the *image smoothing* baseline with our RemedyGS framework against black-box attacks, evaluated in terms of computational cost metrics including the number of Gaussians, peak GPU memory usage, training time, and rendering speed on the Mip-NeRF360 dataset. Compared with the baseline, our RemedyGS demonstrates the strongest capability to defend against computation cost attacks.

| Metric          | Number of Gaussians |                 |                 | Peak GPU memory [MB] |                 |                 | Training time [minutes] |                 |                 | Rendering speed [FPS] |                 |                 |
|-----------------|---------------------|-----------------|-----------------|----------------------|-----------------|-----------------|-------------------------|-----------------|-----------------|-----------------------|-----------------|-----------------|
| Setting \ Scene | clean               | image smoothing | RemedyGS (Ours) | clean                | image smoothing | RemedyGS (Ours) | clean                   | image smoothing | RemedyGS (Ours) | clean                 | image smoothing | RemedyGS (Ours) |
| MIP-bonsai      | 4.396 M             | 3.833 M         | 3.947 M         | 9454                 | 8685            | 8944            | 25.70                   | 28.15           | 24.47           | 172                   | 94              | 184             |
| MIP-counter     | 2.843 M             | 2.439 M         | 2.584 M         | 10586                | 8814            | 9106            | 30.42                   | 31.63           | 30.68           | 41                    | 43              | 44              |
| MIP-kitchen     | 3.395 M             | 3.125 M         | 3.190 M         | 11320                | 10513           | 10116           | 31.56                   | 34.27           | 29.92           | 42                    | 42              | 38              |
| MIP-room        | 2.924 M             | 2.229 M         | 2.454 M         | 11823                | 10097           | 10655           | 28.92                   | 29.51           | 25.04           | 46                    | 49              | 39              |

Table 7. Comparison of the *image smoothing* baseline with our RemedyGS framework against black-box attacks, evaluated in terms of utility metrics including PSNR, LPIPS, and SSIM on the Mip-NeRF360 dataset. Our RemedyGS demonstrates superior performance by effectively recovering clean images from poisoned inputs manipulated by black-box attacks.

| Metric          | PSNR $\uparrow$      |                 |                 | LPIPS $\downarrow$   |                 |                 | SSIM $\uparrow$      |                 |                 |
|-----------------|----------------------|-----------------|-----------------|----------------------|-----------------|-----------------|----------------------|-----------------|-----------------|
| Setting \ Scene | clean (Ground truth) | image smoothing | RemedyGS (Ours) | clean (Ground truth) | image smoothing | RemedyGS (Ours) | clean (Ground truth) | image smoothing | RemedyGS (Ours) |
| MIP-bonsai      | 32.884               | 30.289          | <b>31.554</b>   | 0.182                | 0.253           | <b>0.228</b>    | 0.948                | 0.883           | <b>0.925</b>    |
| MIP-counter     | 29.479               | 28.318          | <b>28.926</b>   | 0.184                | 0.266           | <b>0.233</b>    | 0.917                | 0.853           | <b>0.884</b>    |
| MIP-kitchen     | 31.426               | 29.268          | <b>30.607</b>   | 0.119                | 0.216           | <b>0.158</b>    | 0.932                | 0.861           | <b>0.899</b>    |
| MIP-room        | 32.085               | 30.167          | <b>31.311</b>   | 0.190                | 0.281           | <b>0.243</b>    | 0.931                | 0.847           | <b>0.903</b>    |

Table 8. Performance of the detector in discriminating clean data from poisoned data across varying attack strengths on the Mip-NeRF360 dataset. The detector in our RemedyGS accurately distinguishes poisoned data of different attack strengths.

| Scene      | Metric   | Setting ( $\epsilon$ ) |         |         |
|------------|----------|------------------------|---------|---------|
|            |          | 50/255                 | 100/255 | 150/255 |
| MIP-bonsai | Accuracy | 0.9919                 | 0.9939  | 0.9959  |
|            | F1       | 0.9919                 | 0.9939  | 0.9959  |
|            | Recall   | 0.9919                 | 0.9939  | 0.9959  |
| MIP-all    | Accuracy | 0.9905                 | 0.9929  | 0.9962  |
|            | F1       | 0.9905                 | 0.9929  | 0.9962  |
|            | Recall   | 0.9905                 | 0.9929  | 0.9962  |

portions of poisoned images that remain undetected and unpurified influence the system’s safety performance. We combine 1%, 5%, 10% poisoned images with the remaining purified poisoned images in a scene and test the safety performance of the 3DGS system. The results are detailed in Table 13. The computational cost remains nearly identical to that observed for clean images across different mixed ratios, indicating that the presence of up to 10% poisoned images undetected in a scene almost has negligible influence on system safety. Furthermore, our detector demonstrates discriminative capability, achieving nearly 100% accuracy in identifying poisoned images. Even in cases where a small fraction of poisoned images are misclassified and remain undetected, such errors have minimal to no effect on the overall safety of the system.

## 7.5. Defense Performance in terms of Training Time and Rendering Speed Across Multiple Datasets.

We provide additional evaluation results on the computational cost in terms of training time and rendering speed, as an extension of Table 1. As shown in Table 14, the results indicate that our method mitigates the increase in computational overhead, achieving the same level of computational cost comparable to that of clean images.

## 7.6. Additional Visualization Results

We provide additional qualitative results of our method in Figure 5. The results demonstrate that although limiting the number of Gaussians imposes an upper bound on the computational cost, sharpened regions force reallocation of Gaussians from unsharpened areas, leaving certain regions without Gaussian representation and consequently diminishing local details. In contrast, our method preserves nearly the same level of detail as the clean images.

Additional visualizations of the recovered images by different methods are shown in Figure 6. It confirms that adversarial training effectively alleviates local over-smoothing issues, thereby enhancing perceptual fidelity and enabling higher-quality 3D representations.

## 8. Implementation Details

**Detector.** We train the detector on a curated dataset that consists of paired benign and poisoned images. During the training process of the detector, the images are resized to  $960 \times 528$ . The detector is trained with a learning rate of

Table 9. Comparison of baselines: *image smoothing* and *limiting the number of Gaussians* with the purifier in our RemedyGS framework on poisoned data under varying and stronger attack strengths. The evaluation is conducted on the Mip-NeRF360 dataset using utility metrics. Our RemedyGS demonstrates superior capability in recovering the original clean data from the poisoned data, even under stronger attack scenarios.

| Metric                                                                     |             | PSNR $\uparrow$ |                          |                 | LPIPS $\downarrow$ |                          |                 | SSIM $\uparrow$ |                          |                 |
|----------------------------------------------------------------------------|-------------|-----------------|--------------------------|-----------------|--------------------|--------------------------|-----------------|-----------------|--------------------------|-----------------|
| Setting                                                                    | Scene       | image smoothing | limiting Gaussian number | RemedyGS (Ours) | image smoothing    | limiting Gaussian number | RemedyGS (Ours) | image smoothing | limiting Gaussian number | RemedyGS (Ours) |
| <b>Constrained Poison-splat attack with <math>\epsilon = 26/255</math></b> |             |                 |                          |                 |                    |                          |                 |                 |                          |                 |
|                                                                            | MIP-bonsai  | 28.398          | 22.680                   | <b>30.212</b>   | 0.287              | 0.476                    | <b>0.254</b>    | 0.832           | 0.656                    | <b>0.891</b>    |
|                                                                            | MIP-counter | 27.069          | 20.064                   | <b>27.952</b>   | 0.300              | 0.509                    | <b>0.264</b>    | 0.808           | 0.577                    | <b>0.853</b>    |
|                                                                            | MIP-kitchen | 28.641          | 20.402                   | <b>29.088</b>   | 0.231              | 0.446                    | <b>0.186</b>    | 0.844           | 0.593                    | <b>0.871</b>    |
|                                                                            | MIP-room    | 27.963          | 21.221                   | <b>29.662</b>   | 0.331              | 0.486                    | <b>0.283</b>    | 0.785           | 0.563                    | <b>0.855</b>    |
| <b>Constrained Poison-splat attack with <math>\epsilon = 35/255</math></b> |             |                 |                          |                 |                    |                          |                 |                 |                          |                 |
|                                                                            | MIP-bonsai  | 26.750          | 21.706                   | <b>29.574</b>   | 0.340              | 0.498                    | <b>0.278</b>    | 0.778           | 0.597                    | <b>0.881</b>    |
|                                                                            | MIP-counter | 25.709          | 19.112                   | <b>27.296</b>   | 0.340              | 0.533                    | <b>0.283</b>    | 0.760           | 0.533                    | <b>0.832</b>    |
|                                                                            | MIP-kitchen | 27.544          | 19.637                   | <b>28.388</b>   | 0.263              | 0.477                    | <b>0.212</b>    | 0.812           | 0.532                    | <b>0.849</b>    |
|                                                                            | MIP-room    | 26.005          | 20.129                   | <b>29.045</b>   | 0.375              | 0.506                    | <b>0.304</b>    | 0.719           | 0.507                    | <b>0.839</b>    |
| <b>Constrained Poison-splat attack with <math>\epsilon = 40/255</math></b> |             |                 |                          |                 |                    |                          |                 |                 |                          |                 |
|                                                                            | MIP-bonsai  | 25.739          | 20.830                   | <b>28.871</b>   | 0.367              | 0.509                    | <b>0.291</b>    | 0.742           | 0.569                    | <b>0.859</b>    |
|                                                                            | MIP-counter | 24.929          | 18.633                   | <b>26.764</b>   | 0.361              | 0.542                    | <b>0.294</b>    | 0.731           | 0.514                    | <b>0.813</b>    |
|                                                                            | MIP-kitchen | 26.910          | 19.105                   | <b>27.664</b>   | 0.282              | 0.490                    | <b>0.227</b>    | 0.792           | 0.505                    | <b>0.831</b>    |
|                                                                            | MIP-room    | 25.078          | 19.751                   | <b>28.517</b>   | 0.402              | 0.517                    | <b>0.313</b>    | 0.676           | 0.480                    | <b>0.821</b>    |

$1 \times 10^{-4}$  for 50 epochs using a batch size of 16. During the evaluation, images from the Mip-NeRF360 dataset with a resolution of  $1600 \times 1066$  are randomly cropped to the same resolution as the training data. Due to the locally injected poisoned textures, the detector can effectively identify poisoned images based on these randomly cropped samples.

**Purifier.** We also train the purifier on the curated dataset that consists of paired benign and poisoned images. During training, we resize all input images to a fixed resolution of  $960 \times 544$  to guarantee that the input images can be faithfully reconstructed with a consistent spatial resolution after passing through the encoder-decoder pipeline. The purifier is trained with a learning rate of  $1 \times 10^{-4}$  for 50 epochs using a batch size of 16. During the evaluation, images from the Mip-NeRF360 dataset are resized to  $1600 \times 1056$ .

**Adversarial Training.** For adversarial training of the purifier, we first employ a warm-up model trained solely with the MSE loss in Eq. (10) to stabilize the optimization. We then fix the parameters of this warm-up purifier and train a discriminator to distinguish between the original clean images and the outputs produced by the warm-up purifier. During this stage, the discriminator is trained with a learning rate of  $5 \times 10^{-4}$  for 50 epochs. The discriminator and the warm-up purifier are subsequently used to initialize the adversarial training process, during which the discriminator and purifier are alternately updated. Specifically, the purifier is optimized with a weighted combination of

three losses, as defined in Eq. (14), with weights set to  $\alpha_1 = 0.23$ ,  $\alpha_2 = 100$ , and  $\alpha_3 = 1$ , respectively. The learning rates for both the purifier and the discriminator are set to  $2.5 \times 10^{-4}$  and the epoch is set to 40.

Table 10. Comparison of baselines: *image smoothing* and *limiting the number of Gaussians* with the purifier in our RemedyGS framework on poisoned data under varying and stronger attack strengths. The evaluation is conducted in terms of computation cost metrics on Mip-NeRF360. Our RemedyGS exhibits the strongest capability in defending against even more intensive computation cost attacks.

| Metric                                                                     |                                                                            | Number of Gaussians |                          |                 | Peak GPU memory [MB] |                          |                 | Training time [minutes] |                          |       | Rendering speed [FPS] |                          |                 |
|----------------------------------------------------------------------------|----------------------------------------------------------------------------|---------------------|--------------------------|-----------------|----------------------|--------------------------|-----------------|-------------------------|--------------------------|-------|-----------------------|--------------------------|-----------------|
| Scene                                                                      | Setting                                                                    | image smoothing     | limiting Gaussian number | RemedyGS (Ours) | image smoothing      | limiting Gaussian number | RemedyGS (Ours) | image smoothing         | limiting Gaussian number | ours  | image smoothing       | limiting Gaussian number | RemedyGS (Ours) |
|                                                                            | <b>Constrained Poison-splat attack with <math>\epsilon = 26/255</math></b> |                     |                          |                 |                      |                          |                 |                         |                          |       |                       |                          |                 |
| MIP-bonsai                                                                 |                                                                            | 0.798 M             | 2.148 M                  | 1.031 M         | 8912                 | 11590                    | 8731            | 17.04                   | 19.58                    | 17.77 | 307                   | 168                      | 260             |
| MIP-counter                                                                |                                                                            | 0.772 M             | 2.099 M                  | 0.966 M         | 8693                 | 10074                    | 9133            | 19.92                   | 20.38                    | 20.79 | 247                   | 194                      | 201             |
| MIP-kitchen                                                                |                                                                            | 1.017 M             | 2.101 M                  | 1.515 M         | 9861                 | 10418                    | 10521           | 22.79                   | 21.97                    | 23.08 | 199                   | 146                      | 149             |
| MIP-room                                                                   |                                                                            | 0.961 M             | 2.150 M                  | 1.102 M         | 11120                | 12185                    | 10374           | 20.33                   | 20.10                    | 20.97 | 213                   | 153                      | 182             |
| <b>Constrained Poison-splat attack with <math>\epsilon = 35/255</math></b> |                                                                            |                     |                          |                 |                      |                          |                 |                         |                          |       |                       |                          |                 |
| MIP-bonsai                                                                 |                                                                            | 0.972 M             | 2.169 M                  | 0.980 M         | 8659                 | 10814                    | 8603            | 17.80                   | 20.03                    | 17.59 | 272                   | 163                      | 264             |
| MIP-counter                                                                |                                                                            | 0.832 M             | 2.117 M                  | 0.917 M         | 9190                 | 9785                     | 8870            | 20.55                   | 20.00                    | 20.26 | 218                   | 204                      | 215             |
| MIP-kitchen                                                                |                                                                            | 1.144 M             | 2.130 M                  | 1.533 M         | 10056                | 10582                    | 10340           | 23.44                   | 22.44                    | 23.14 | 180                   | 146                      | 148             |
| MIP-room                                                                   |                                                                            | 1.289 M             | 2.167 M                  | 1.015 M         | 13269                | 12652                    | 10282           | 22.24                   | 20.23                    | 20.45 | 161                   | 147                      | 201             |
| <b>Constrained Poison-splat attack with <math>\epsilon = 40/255</math></b> |                                                                            |                     |                          |                 |                      |                          |                 |                         |                          |       |                       |                          |                 |
| MIP-bonsai                                                                 |                                                                            | 1.130 M             | 2.186 M                  | 0.948 M         | 8850                 | 11158                    | 8586            | 18.28                   | 18.19                    | 17.56 | 137                   | 169                      | 261             |
| MIP-counter                                                                |                                                                            | 0.894 M             | 2.122 M                  | 0.909 M         | 9548                 | 9885                     | 9237            | 20.72                   | 19.26                    | 17.43 | 207                   | 200                      | 205             |
| MIP-kitchen                                                                |                                                                            | 1.313 M             | 2.132 M                  | 1.692 M         | 10508                | 10532                    | 10790           | 24.09                   | 20.15                    | 22.26 | 229                   | 148                      | 137             |
| MIP-room                                                                   |                                                                            | 1.625 M             | 2.159 M                  | 0.986 M         | 15710                | 12514                    | 10227           | 23.31                   | 18.89                    | 20.44 | 174                   | 149                      | 208             |

Table 11. Defense performance against adaptive computation cost attacks. The evaluation is conducted in terms of computation cost metrics on NeRF-Synthetic. Our RemedyGS also possesses the capability in defending against such more intensive computation cost attacks.

| Metric                                              |                                                    | Number of Gaussians  |         |                 | Peak GPU memory [MB] |        |                 | Training time [minutes] |        |                 |
|-----------------------------------------------------|----------------------------------------------------|----------------------|---------|-----------------|----------------------|--------|-----------------|-------------------------|--------|-----------------|
| Scene                                               | Setting                                            | clean (Ground truth) | Attack  | RemedyGS (Ours) | clean (Ground truth) | Attack | RemedyGS (Ours) | clean (Ground truth)    | Attack | RemedyGS (Ours) |
|                                                     | <b>Adaptive attack with <math>\beta = 1</math></b> |                      |         |                 |                      |        |                 |                         |        |                 |
| NS-chair                                            |                                                    | 0.495 M              | 0.901 M | 0.485 M         | 4633                 | 8410   | 4804            | 7.81                    | 10.25  | 7.93            |
| NS-ficus                                            |                                                    | 0.267 M              | 0.285 M | 0.220 M         | 4052                 | 5984   | 4040            | 6.41                    | 7.56   | 7.86            |
| <b>Adaptive attack with <math>\beta = 5</math></b>  |                                                    |                      |         |                 |                      |        |                 |                         |        |                 |
| NS-chair                                            |                                                    | 0.495 M              | 0.932 M | 0.492 M         | 4633                 | 8828   | 4892            | 7.81                    | 10.78  | 8.66            |
| NS-ficus                                            |                                                    | 0.267 M              | 0.287 M | 0.215 M         | 4052                 | 6268   | 4028            | 6.41                    | 7.90   | 6.33            |
| <b>Adaptive attack with <math>\beta = 20</math></b> |                                                    |                      |         |                 |                      |        |                 |                         |        |                 |
| NS-chair                                            |                                                    | 0.495 M              | 0.931 M | 0.492 M         | 4633                 | 8772   | 4886            | 7.81                    | 10.20  | 8.18            |
| NS-ficus                                            |                                                    | 0.267 M              | 0.298 M | 0.213 M         | 4052                 | 6302   | 4002            | 6.41                    | 7.36   | 6.33            |

Table 12. Defense performance against adaptive computation cost attacks. The evaluation is conducted in terms of utility metrics on NeRF-Synthetic. The purifier of our RemedyGS still has the capability in recovering clean images even under more intensive computation cost attacks.

| Metric                                              |                                                    | PSNR                 |        |                 | LPIPS                |        |                 | SSIM                 |        |                 |
|-----------------------------------------------------|----------------------------------------------------|----------------------|--------|-----------------|----------------------|--------|-----------------|----------------------|--------|-----------------|
| Scene                                               | Setting                                            | clean (Ground truth) | Attack | RemedyGS (Ours) | clean (Ground truth) | Attack | RemedyGS (Ours) | clean (Ground truth) | Attack | RemedyGS (Ours) |
|                                                     | <b>Adaptive attack with <math>\beta = 1</math></b> |                      |        |                 |                      |        |                 |                      |        |                 |
| NS-chair                                            |                                                    | 35.776               | 28.402 | 33.343          | 0.010                | 0.218  | 0.032           | 0.988                | 0.240  | 0.621           |
| NS-ficus                                            |                                                    | 35.542               | 28.488 | 34.295          | 0.012                | 0.323  | 0.017           | 0.987                | 0.218  | 0.610           |
| <b>Adaptive attack with <math>\beta = 5</math></b>  |                                                    |                      |        |                 |                      |        |                 |                      |        |                 |
| NS-chair                                            |                                                    | 35.776               | 29.223 | 33.256          | 0.010                | 0.287  | 0.033           | 0.988                | 0.278  | 0.584           |
| NS-ficus                                            |                                                    | 35.542               | 29.673 | 34.179          | 0.012                | 0.320  | 0.017           | 0.987                | 0.271  | 0.571           |
| <b>Adaptive attack with <math>\beta = 20</math></b> |                                                    |                      |        |                 |                      |        |                 |                      |        |                 |
| NS-chair                                            |                                                    | 35.776               | 29.616 | 32.582          | 0.010                | 0.277  | 0.033           | 0.988                | 0.309  | 0.514           |
| NS-ficus                                            |                                                    | 35.542               | 30.062 | 33.633          | 0.012                | 0.351  | 0.022           | 0.987                | 0.296  | 0.487           |

Table 13. Impact of different ratios of undetected poisoned data in a scene on safety performance in term of computation cost metrics including the number of Gaussians, peak GPU memory, training time, and rendering speed.

| Metric                  | Number of Gaussians |         |         | Peak GPU memory [MB] |        |       | Training time [minutes] |        |       | Rendering speed [FPS] |        |       |
|-------------------------|---------------------|---------|---------|----------------------|--------|-------|-------------------------|--------|-------|-----------------------|--------|-------|
| Setting<br>Scene        | clean               | attack  | Mixed   | clean                | attack | Mixed | clean                   | attack | Mixed | clean                 | attack | Mixed |
| <b>Mixed ratio: 1%</b>  |                     |         |         |                      |        |       |                         |        |       |                       |        |       |
| NS-chair                | 0.495 M             | 0.942 M | 0.492 M | 4633                 | 9378   | 4834  | 7.81                    | 12.41  | 9.63  | 345                   | 170    | 354   |
| NS-ficus                | 0.267 M             | 0.288 M | 0.220 M | 4052                 | 5447   | 4057  | 6.41                    | 10.90  | 8.66  | 606                   | 447    | 647   |
| MIP-room                | 1.536 M             | 7.368 M | 1.177 M | 11370                | 47721  | 10879 | 22.14                   | 48.11  | 20.71 | 154                   | 31     | 191   |
| <b>Mixed ratio: 5%</b>  |                     |         |         |                      |        |       |                         |        |       |                       |        |       |
| NS-chair                | 0.495 M             | 0.942 M | 0.503 M | 4633                 | 9378   | 4922  | 7.81                    | 12.41  | 8.69  | 345                   | 170    | 338   |
| NS-ficus                | 0.267 M             | 0.288 M | 0.220 M | 4052                 | 5447   | 4050  | 6.41                    | 10.90  | 8.02  | 606                   | 447    | 615   |
| MIP-room                | 1.536 M             | 7.368 M | 1.178 M | 11370                | 47721  | 10954 | 22.14                   | 48.11  | 20.67 | 154                   | 31     | 199   |
| <b>Mixed ratio: 10%</b> |                     |         |         |                      |        |       |                         |        |       |                       |        |       |
| NS-chair                | 0.495 M             | 0.942 M | 0.520 M | 4633                 | 9378   | 4906  | 7.81                    | 12.41  | 9.79  | 345                   | 170    | 314   |
| NS-ficus                | 0.267 M             | 0.288 M | 0.223 M | 4052                 | 5447   | 4060  | 6.41                    | 10.90  | 8.89  | 606                   | 447    | 616   |
| MIP-room                | 1.536 M             | 7.368 M | 1.165 M | 11370                | 47721  | 10977 | 22.14                   | 48.11  | 20.47 | 154                   | 31     | 196   |

Table 14. Comparison of baselines: *image smoothing* and *limiting the number of Gaussians* with our RemedyGS framework on poisoned data, evaluated in terms of computational cost metrics including training time and rendering speed across NeRF-Synthetic, Mip-NeRF360 and Tanks-and-Temples datasets. Our RemedyGS effectively mitigates the negative impact of computation cost attacks.

| Metric           | Training time [minutes] |          |                 |                          |       | Rendering speed [FPS] |          |                 |                          |      |
|------------------|-------------------------|----------|-----------------|--------------------------|-------|-----------------------|----------|-----------------|--------------------------|------|
| Setting<br>Scene | clean                   | poisoned | image smoothing | limiting Gaussian number | ours  | clean                 | poisoned | image smoothing | limiting Gaussian number | ours |
| NS-chair         | 7.81                    | 12.41    | 9.71            | 8.61                     | 10.07 | 345                   | 170      | 645             | 371                      | 348  |
| NS-ficus         | 6.41                    | 10.90    | 9.08            | 9.16                     | 9.48  | 606                   | 447      | 797             | 471                      | 701  |
| NS-hotdog        | 7.68                    | 16.23    | 9.31            | 9.98                     | 10.85 | 655                   | 100      | 852             | 356                      | 374  |
| NS-lego          | 7.36                    | 13.77    | 9.96            | 9.52                     | 10.34 | 483                   | 194      | 702             | 403                      | 445  |
| NS-Avg           | 7.30                    | 12.87    | 9.66            | 9.61                     | 10.17 | 566                   | 236      | 786             | 373                      | 489  |
| MIP-bonsai       | 16.66                   | 33.72    | 13.98           | 18.11                    | 18.63 | 222                   | 60       | 290             | 178                      | 277  |
| MIP-counter      | 22.21                   | 35.46    | 17.79           | 20.67                    | 23.7  | 175                   | 55       | 240             | 192                      | 213  |
| MIP-kitchen      | 22.84                   | 41.99    | 19.56           | 20.05                    | 23.64 | 138                   | 46       | 205             | 157                      | 168  |
| MIP-room         | 22.14                   | 48.11    | 17.26           | 19.45                    | 23.86 | 154                   | 31       | 225             | 147                      | 185  |
| MIP-Avg          | 25.37                   | 40.62    | 18.94           | 24.94                    | 24.59 | 128                   | 51       | 197             | 129                      | 157  |
| TT-Barn          | 13.54                   | 17.03    | 12.19           | 10.52                    | 11.61 | 265                   | 135      | 481             | 388                      | 343  |
| TT-Francis       | 10.19                   | 13.47    | 10.47           | 9.71                     | 10.15 | 300                   | 159      | 497             | 349                      | 477  |
| TT-M60           | 13.85                   | 19.32    | 11.68           | 14.45                    | 10.88 | 188                   | 103      | 331             | 194                      | 301  |
| TT-Panther       | 14.68                   | 20.58    | 9.63            | 14.56                    | 10.07 | 179                   | 95       | 390             | 205                      | 309  |
| TT-Avg           | 15.27                   | 19.60    | 11.71           | 14.63                    | 12.59 | 194                   | 122      | 347             | 231                      | 288  |

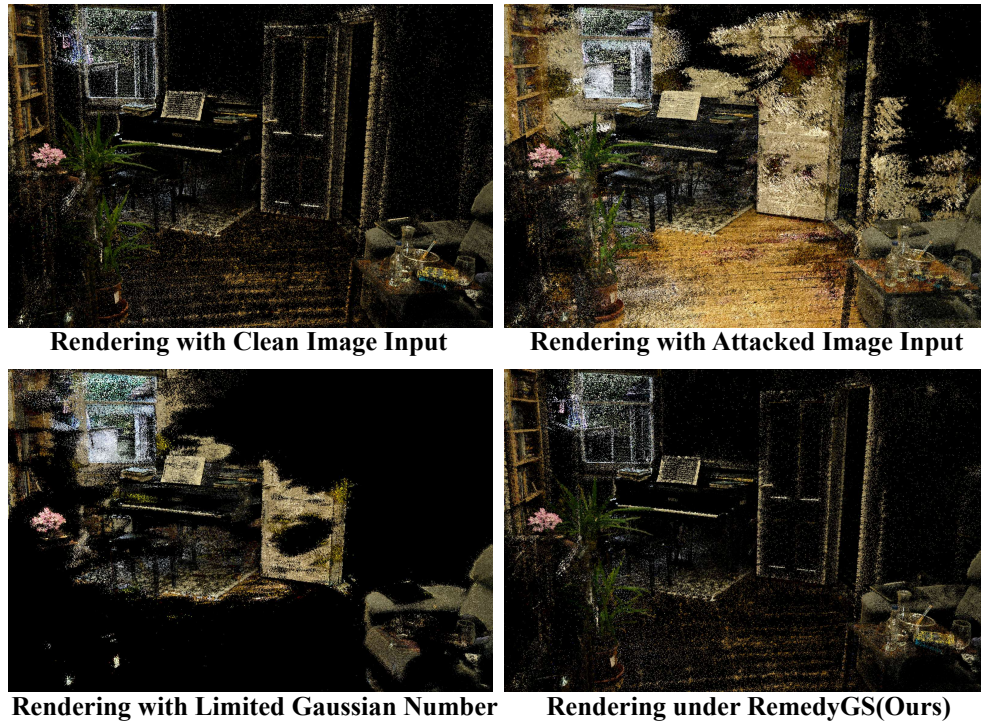

Figure 5. 3D Gaussian point cloud visualization of rendering results from different input images. Top row: (Left) Point cloud visualization of rendering from clean image input. (Right) Point cloud visualization of rendering from attacked image input. Bottom row: (Left) Point cloud visualization of rendering from the limiting Gaussian number defense method. (Right) Point cloud visualization of rendering from our RemedyGS method.

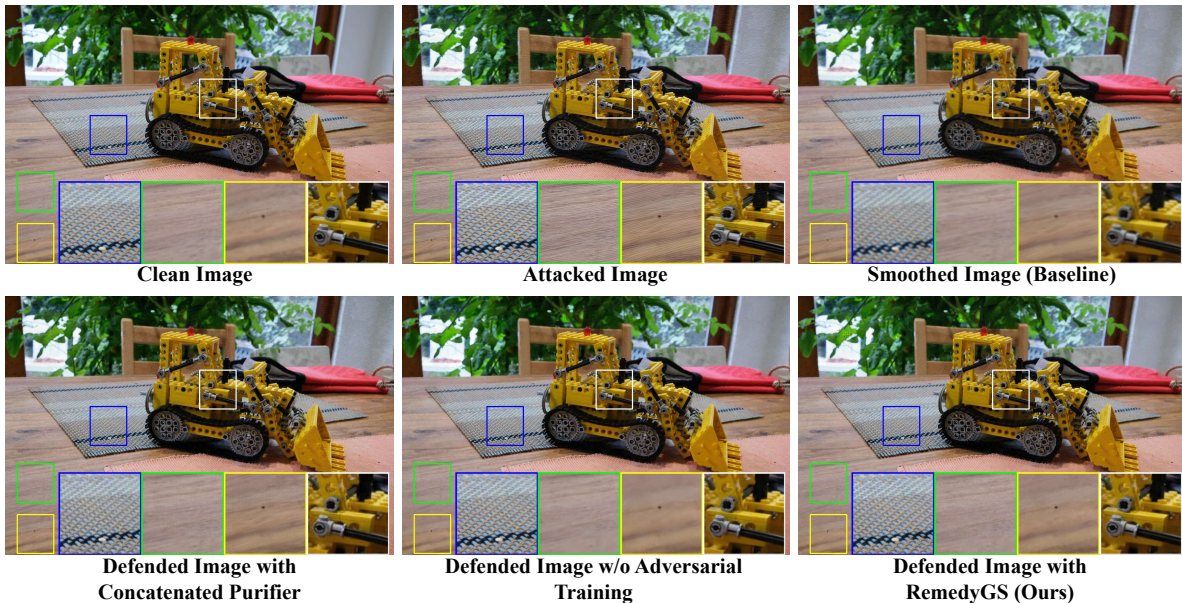

Figure 6. Qualitative results for the kitchen scene in the Mip-NeRF360 dataset. Top row: (left) clean input image, (middle) attacked input image, (right) defended input image using the image smoothing baseline. Bottom row: (left) purified input image using the purifier with concatenated skip connections, (middle) purified input image using the purifier with added skip connections but without adversarial training, (right) purified input image using the purifier in our RemedyGS framework. Our method achieves the best recovery performance among all baselines and effectively mitigates the issue of local over-smoothing compared with methods without adversarial training.

## 9. Derivation for the Optimal Discriminator

In this section, we rigorously derive the expression of the optimal discriminator in Eq. (12). Note that

$$\mathcal{L}_{\mathcal{F}} = \min_{\mathcal{F}} -\mathbb{E}_{p_{\text{cIn}}} \log(\mathcal{F}(\mathbf{V}|\mathbf{c})) - \mathbb{E}_{p_{\text{rec}}} \log(1 - \mathcal{F}(\mathbf{V}|\mathbf{c})) \quad (16)$$

$$= \min_{\mathcal{F}} \int_{\mathbf{V}} \{ -p_{\text{cIn}}(\mathbf{V}) \log(\mathcal{F}(\mathbf{V}|\mathbf{c})) - p_{\text{rec}}(\mathbf{V}) \log(1 - \mathcal{F}(\mathbf{V}|\mathbf{c})) \} d\mathbf{V}. \quad (17)$$

For any  $\alpha \in \mathbb{R} \setminus \{0\}$  and  $\beta \in \mathbb{R} \setminus \{0\}$ , considering a function  $f(x) = \alpha \log(x) + \beta \log(1 - x)$  with  $x \in [0, 1]$ ,  $f(x)$  achieves its maximum at  $x = \frac{\alpha}{\alpha + \beta}$ . Therefore, given a fixed purifier, the optimal discriminator  $\mathcal{F}^*$  is given by

$$\mathcal{F}^* = \frac{p_{\text{cIn}}(\mathbf{V})}{p_{\text{cIn}}(\mathbf{V}) + p_{\text{rec}}(\mathbf{V})}. \quad (18)$$

## 10. Derivation for the Maximum Adversarial Training Objective

In this section, we provide the detailed derivation of the conclusion that Eq. (13) is maximized if and only if the reconstructed distribution matches the clean distribution. We have

$$\mathcal{L}_G = \max_{\phi, \theta} \{ -\mathbb{E}_{p_{\text{cIn}}} \log(\mathcal{F}^*(\mathbf{V}|\mathbf{c})) - \mathbb{E}_{p_{\text{rec}}} \log(1 - \mathcal{F}^*(\mathbf{V}|\mathbf{c})) \} \quad (19)$$

$$= \max_{\phi, \theta} \left\{ -\mathbb{E}_{p_{\text{cIn}}} \log \left( \frac{p_{\text{cIn}}(\mathbf{V})}{p_{\text{cIn}}(\mathbf{V}) + p_{\text{rec}}(\mathbf{V})} \right) - \mathbb{E}_{p_{\text{rec}}} \log \left( \frac{p_{\text{rec}}(\mathbf{V})}{p_{\text{cIn}}(\mathbf{V}) + p_{\text{rec}}(\mathbf{V})} \right) \right\} \quad (20)$$

$$= \max_{\phi, \theta} \left\{ -\mathbb{E}_{p_{\text{cIn}}} \log \left( \frac{p_{\text{cIn}}(\mathbf{V})}{2 \cdot \frac{p_{\text{cIn}}(\mathbf{V}) + p_{\text{rec}}(\mathbf{V})}{2}} \right) - \mathbb{E}_{p_{\text{rec}}} \log \left( \frac{p_{\text{rec}}(\mathbf{V})}{2 \cdot \frac{p_{\text{cIn}}(\mathbf{V}) + p_{\text{rec}}(\mathbf{V})}{2}} \right) \right\} \quad (21)$$

$$= \max_{\phi, \theta} \left\{ 2 \log 2 - \mathbb{E}_{p_{\text{cIn}}} \log \left( \frac{p_{\text{cIn}}(\mathbf{V})}{\frac{p_{\text{cIn}}(\mathbf{V}) + p_{\text{rec}}(\mathbf{V})}{2}} \right) - \mathbb{E}_{p_{\text{rec}}} \log \left( \frac{p_{\text{rec}}(\mathbf{V})}{\frac{p_{\text{cIn}}(\mathbf{V}) + p_{\text{rec}}(\mathbf{V})}{2}} \right) \right\} \quad (22)$$

$$= \max_{\phi, \theta} \left\{ 2 \log 2 - KL \left( p_{\text{cIn}}(\mathbf{V}) \parallel \frac{p_{\text{cIn}}(\mathbf{V}) + p_{\text{rec}}(\mathbf{V})}{2} \right) - KL \left( p_{\text{rec}}(\mathbf{V}) \parallel \frac{p_{\text{cIn}}(\mathbf{V}) + p_{\text{rec}}(\mathbf{V})}{2} \right) \right\}, \quad (23)$$

where  $KL(p_{\text{cIn}}(\mathbf{V}) \parallel \frac{p_{\text{cIn}}(\mathbf{V}) + p_{\text{rec}}(\mathbf{V})}{2})$  and  $KL(p_{\text{rec}}(\mathbf{V}) \parallel \frac{p_{\text{cIn}}(\mathbf{V}) + p_{\text{rec}}(\mathbf{V})}{2})$  denote the Kullback–Leibler divergence. According to the definition of the Jensen-Shannon divergence, we have

$$\mathcal{L}_G = \max_{\phi, \theta} 2 \log 2 - JSD(p_{\text{cIn}}(\mathbf{V}) \parallel p_{\text{rec}}(\mathbf{V})), \quad (24)$$

where  $JSD$  denotes the Jensen-Shannon divergence. Since  $JSD$  is nonnegative,  $\mathcal{L}_G$  achieves its maximum when  $JSD(p_{\text{cIn}}(\mathbf{V}) \parallel p_{\text{rec}}(\mathbf{V})) = 0$ , which occurs if and only if  $p_{\text{rec}}(\mathbf{V}) = p_{\text{cIn}}(\mathbf{V})$ . Therefore,  $\mathcal{L}_G$  is maximized precisely when the reconstructed distribution matches the clean distribution.

## References

- [1] Francesco Croce and Matthias Hein. Minimally distorted adversarial examples with a fast adaptive boundary attack. In *International conference on machine learning*, pages 2196–2205. PMLR, 2020. 1
- [2] Ye Liu, Yaya Cheng, Lianli Gao, Xianglong Liu, Qilong Zhang, and Jingkuan Song. Practical evaluation of adversarial robustness via adaptive auto attack. In *Proceedings of the IEEE/CVF Conference on Computer Vision and Pattern Recognition*, pages 15105–15114, 2022. 1
- [3] Jiahao Lu, Yifan Zhang, Qihong Shen, Xinchao Wang, and Shuicheng Yan. Poison-splat: Computation cost attack on 3d gaussian splatting. *arXiv preprint arXiv:2410.08190*, 2024. 1
- [4] Tao Lu, Mulin Yu, Linning Xu, Yuanbo Xiangli, Limin Wang, Dahua Lin, and Bo Dai. Scaffold-gs: Structured 3d gaussians for view-adaptive rendering. In *Proceedings of the IEEE/CVF Conference on Computer Vision and Pattern Recognition*, pages 20654–20664, 2024. 1
- [5] Jeonghwan Park, Niall McLaughlin, and Ihsen Alouani. Mind

the gap: Detecting black-box adversarial attacks in the making through query update analysis. In *Proceedings of the Computer Vision and Pattern Recognition Conference*, pages 10235–10243, 2025. [1](#)

- [6] Florian Tramer, Nicholas Carlini, Wieland Brendel, and Alexander Madry. On adaptive attacks to adversarial example defenses. *Advances in neural information processing systems*, 33:1633–1645, 2020. [1](#)
